# Supplementary material for: Spatial variability in bedload transport rates determined by river pattern
Source: Copernicus journal article supplement (doi:10.5194/egusphere-2025-2722), 2025-07-07
Supplement: Supplementary file 1 [file egusphere-2025-2722-supplement.pdf]

## **Spatial variability in bedload transport rates determined by river pattern**

**Laura Quick<sup>1,5</sup>, Trevor B. Hoey<sup>2</sup>, Richard David Williams<sup>1</sup>, Richard J. Boothroyd<sup>3</sup>, Pammie M.L. Tolentino<sup>1</sup>, Carlo P.C. David<sup>4</sup>**

<sup>1</sup>School of Geographical and Earth Sciences, University of Glasgow, Glasgow, G12 8QQ, United Kingdom

<sup>2</sup>Department of Civil and Environmental Engineering, Brunel University of London, Uxbridge, UB8 3PH, United Kingdom

<sup>3</sup>Department of Geography and Planning, University of Liverpool, Liverpool, L69 7ZT, United Kingdom

<sup>4</sup>National Institute of Geological Sciences, University of the Philippines, Diliman, Quezon City, 1101, Philippines

<sup>5</sup>College of Science and Engineering, University of Edinburgh, Edinburgh, EH9 3JY, United Kingdom

Correspondence to: Richard D. Williams ([richard.williams@glasgow.ac.uk](mailto:richard.williams@glasgow.ac.uk))

### **Contents of this file**

Figures S1 to S5

Table S1

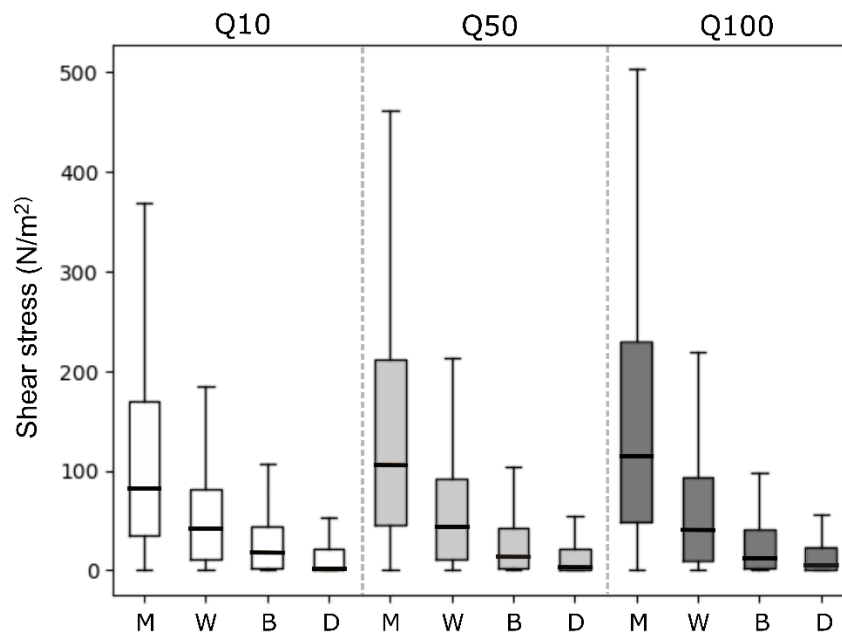

**Figure S1. Shear stress for the four identified river patterns (meandering, wandering, braided, deltaic) along the Bislak River for different flow magnitudes ( $Q_{10}$ ,  $Q_{50}$ ,  $Q_{100}$ ).**

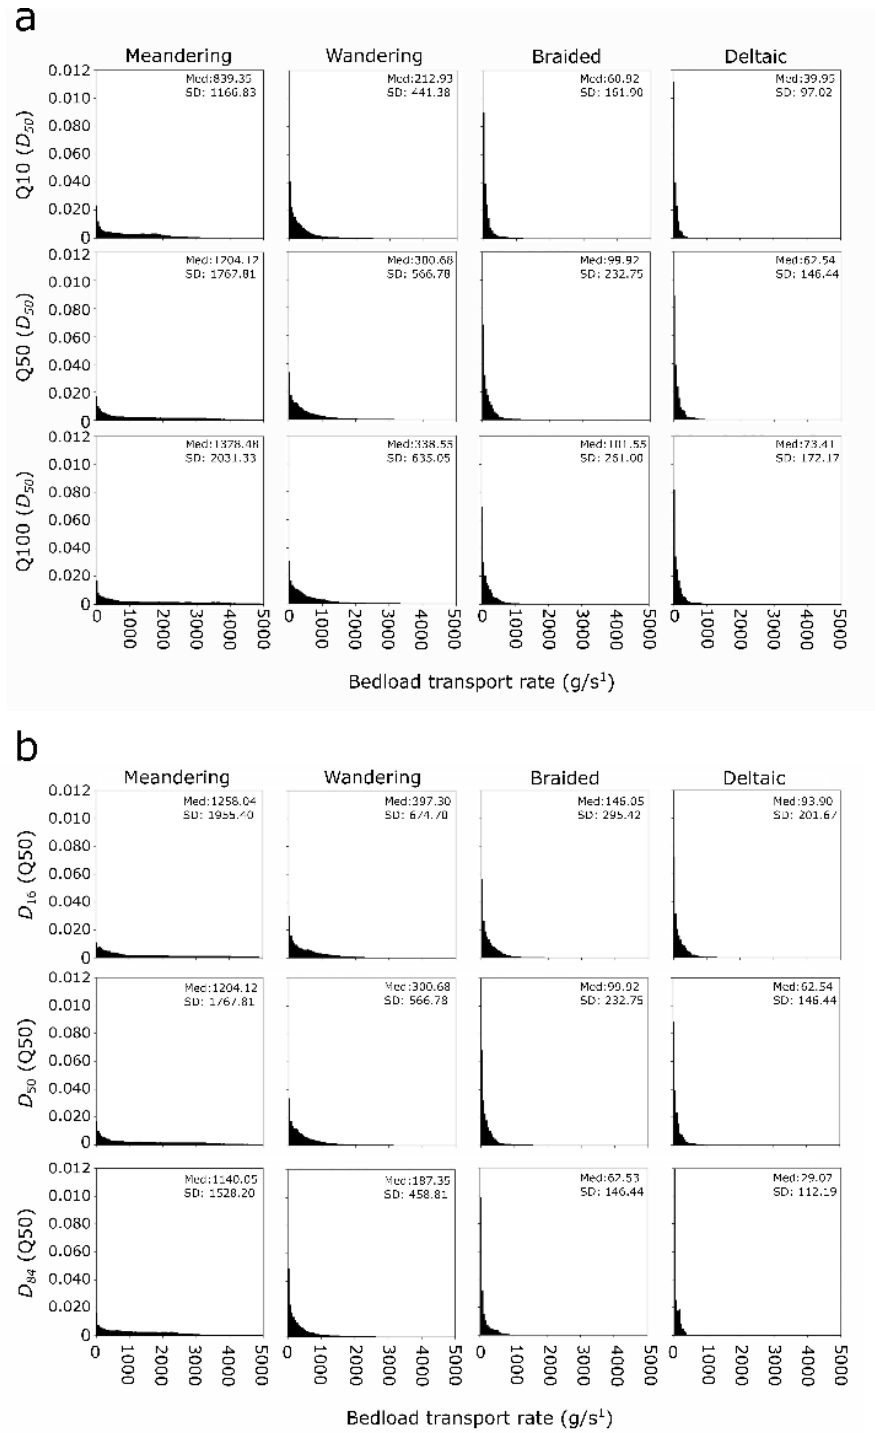

**Figure S2. Probability density functions (PDFs) of bedload transport rate for the four identified river patterns (meandering, wandering, braided, deltaic) along the Bislak River using  $k = 1.5$  (Eq 1). a. Bedload transport rates for each river pattern for**

different low magnitudes ( $Q_{10}$ ,  $Q_{50}$ ,  $Q_{100}$ ). b. Bedload transport rates for each river pattern for a single flow magnitude ( $Q_{50}$ ), with different grain sizes ( $D_{16}$ ,  $D_{50}$  and  $D_{84}$ ).

**a**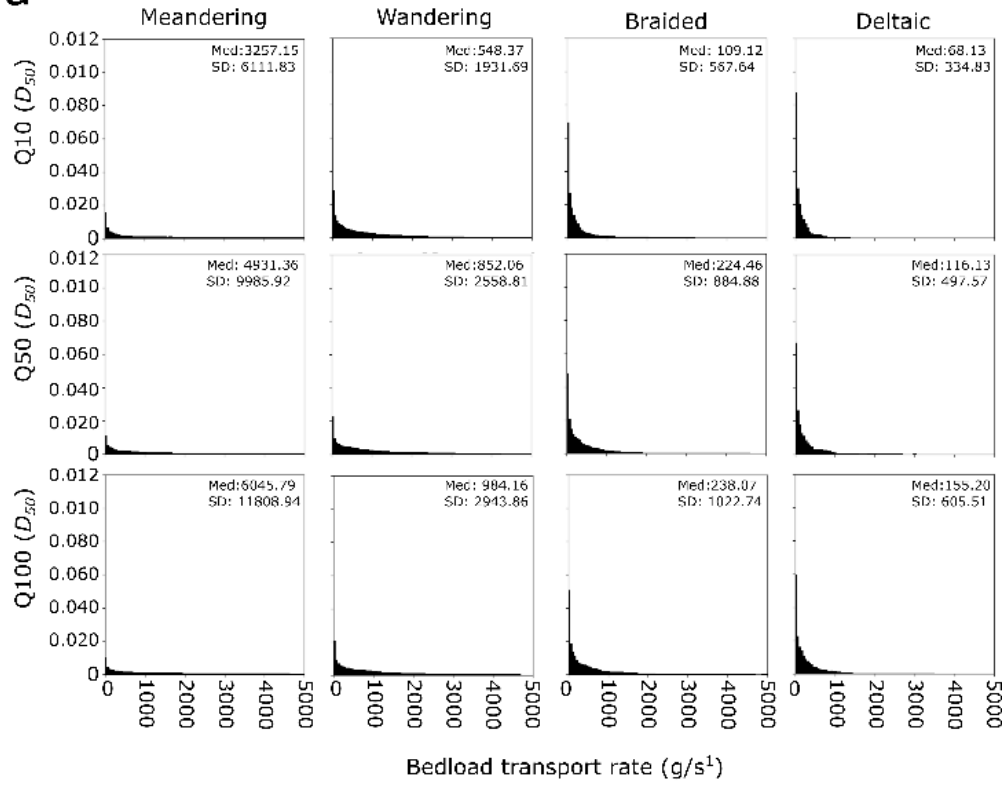**b**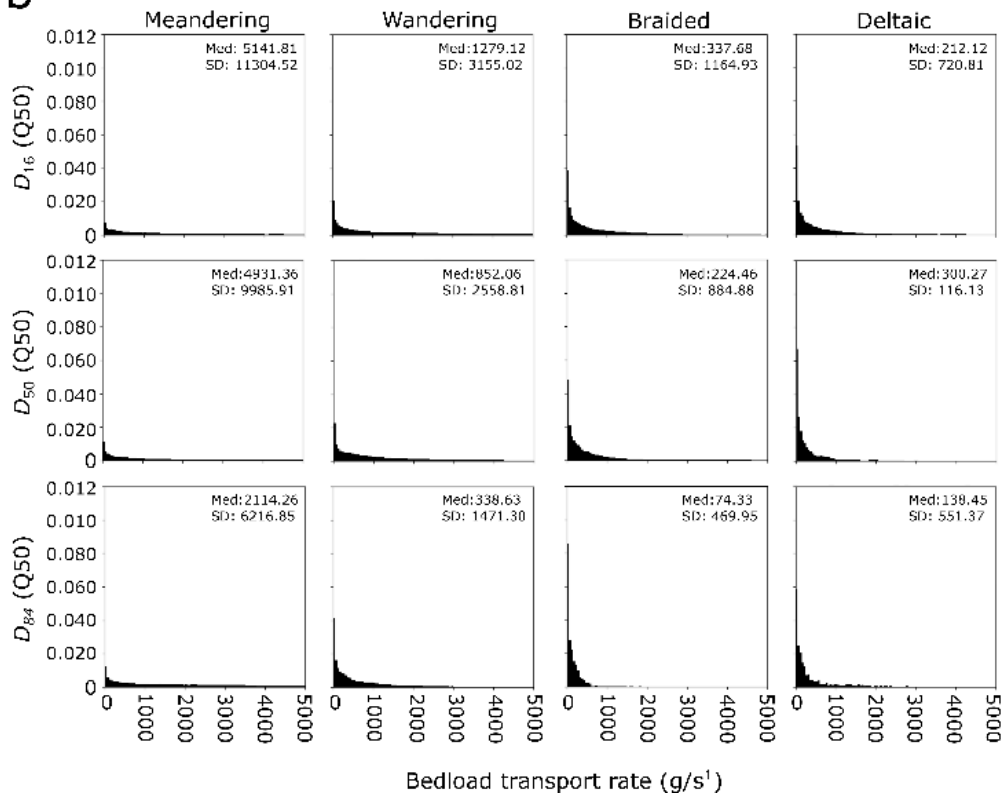

**Figure S3. PDFs of bedload transport rate for the four identified river patterns (meandering, wandering, braided, deltaic) along the Bislak River using  $k = 1.8$  (Eq 1). a. Bedload transport rates for each river pattern for different flow magnitudes ( $Q_{10}$ ,  $Q_{50}$ ,  $Q_{100}$ ). b. Bedload transport rates for each river pattern for a single flow magnitude ( $Q_{50}$ ), with different grain sizes ( $D_{16}$ ,  $D_{50}$  and  $D_{84}$ ).**

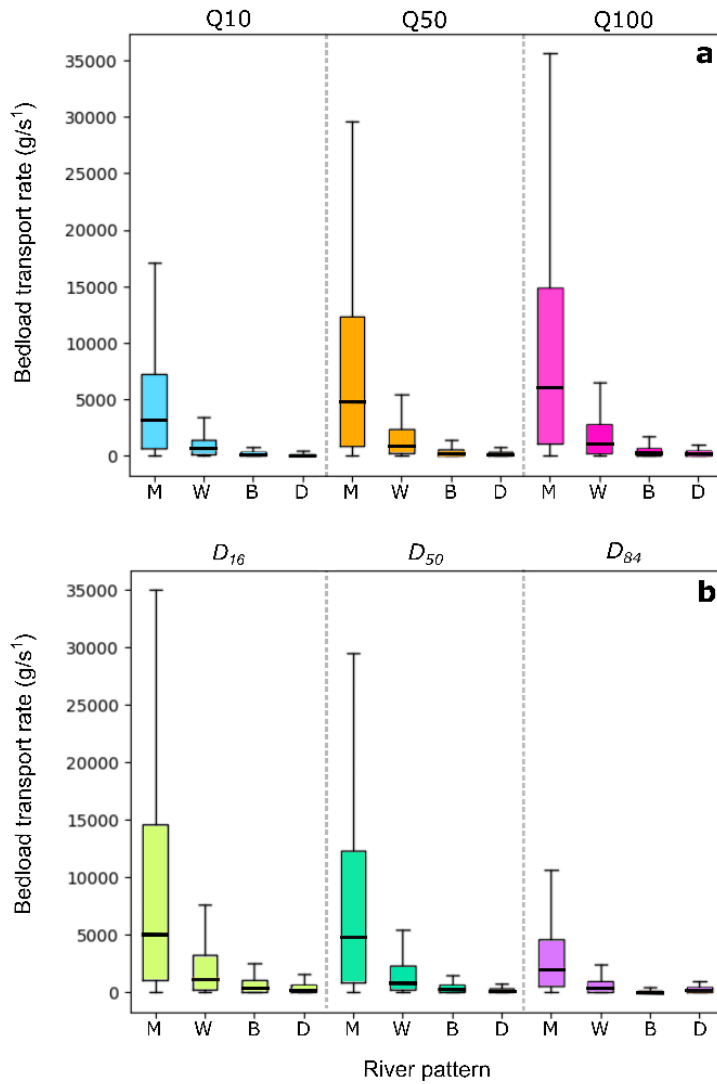

**Figure S4. Fig 3. Bedload transport rates for the four identified river patterns (meandering, wandering, braided, deltaic) along the Bislak River using  $k = 1.8$  (Eq 1). a. Bedload transport rates for each river pattern for different flow magnitudes ( $Q_{10}$ ,  $Q_{50}$ ,  $Q_{100}$ ). b. Bedload transport rates for each river pattern for a single flow magnitude ( $Q_{50}$ ), with different grain sizes ( $D_{16}$ ,  $D_{50}$  and  $D_{84}$ ).**

**Table S1. River pattern characterisation based on River Styles analysis reported in Tolentino et al. (2022).**

| <b>Pattern</b>    | <b>Valley setting</b>                                                            | <b>Valley width (m)</b> | <b>Channel Planform</b>                          | <b>Geomorphic units</b>                                                                                                                                                          | <b>Slope</b> | <b>River Styles description</b>                                                             |
|-------------------|----------------------------------------------------------------------------------|-------------------------|--------------------------------------------------|----------------------------------------------------------------------------------------------------------------------------------------------------------------------------------|--------------|---------------------------------------------------------------------------------------------|
| <b>Meandering</b> | Confined (>85% of channel margin abuts valley bottom margin)                     | 110–350                 | Single thread, moderate sinuosity                | Instream units: rapids, pools, runs, boulder bars, benches, ledges.<br>Floodplain units: terrace                                                                                 | 0.0045       | Confined, occasional floodplain pockets, gravel/boulder bed                                 |
| <b>Wandering</b>  | Partly confined (10–85% of either channel margin abuts valley bottom margin)     | 500–1450                | Single - multi thread, low to moderate sinuosity | Instream units: pools, riffles, runs, benches, ledges<br>Floodplain units: floodplain, terrace, flood channels, chute channels                                                   | 0.0031       | Partly confined, planform-controlled wandering, discontinuous floodplain, gravel/cobble bed |
| <b>Braided</b>    | Laterally unconfined (< 10% of channel margin abuts valley bottom margin)        | > 2000                  | Multiple threads, low sinuosity                  | Instream units: pools, riffles, runs, compound bank-attached bars, compound islands, benches, ledges<br>Floodplain units: paleochannel, chute channels, flood channels           | 0.0023       | Laterally unconfined, continuous channel, braided, gravel bed                               |
| <b>Deltaic</b>    | Laterally unconfined (< 10% of either channel margin abuts valley bottom margin) | > 2000                  | Multiple threads, low sinuosity                  | Instream units: compound bank-attached bars, compound islands.<br>Floodplain units: paleochannel, anabranches, flood channels and flood runners, backswamp, chute channel, levee | 0.0016       | Laterally unconfined, continuous channel, deltaic, gravel bed                               |
